# Supplementary material for: Consumption of Limosilactobacillus fermentum Inhibits Corneal Damage and Inflammation in Dry Eye Disease Mice Model through Regulating the Gut Microbiome
Source: Preprints.org preprint supplement (doi:10.20944/preprints202402.1226.v1), 2024-02-21
Supplement: Supplementary file 1 [file supplementary]

Article

Consumption of *Limosilactobacillus fermentum* inhibits corneal damage and inflammation in dry eye disease mice model through regulating the gut microbiome

Kippeum Lee †, Hyeonjun Gwon, Jae Jung Shim, Joo Yun Kim *, and Jae Hwan Lee

| **Citation:** To be added by editorial staff during production.  Academic Editor: Firstname Lastname  Received: date  Revised: date  Accepted: date  Published: date  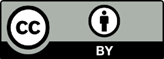  **Copyright:** © 2023 by the authors. Submitted for possible open access publication under the terms and conditions of the Creative Commons Attribution (CC BY) license (https://creativecommons.org/licenses/by/4.0/). |
| --- |

1 R&BD Center, hy Co Ltd., 22, Giheungdanji-ro 24 beon-gil, Giheung-gu, Gyeonggi-do 17086, Korea; joy4917@hanmail.net (K.L.); [hjgwon@hy.co.kr](mailto:hjgwon@hy.co.kr) (H. K.); jjshim@hy.co.kr (J.J.S.); monera@hy.co.kr (J.Y.K); jaehwan@hy.co.kr (J.W.L)

***** Correspondence: monera@hy.co.kr (J.Y.K)

† First author

**Figure S1.** **Effect of HY7302 on the taxonomy difference genus profile in BAC-induced cornea damag mice.** Taxonomic abundance comparisonat genus level from 16S rDNA sequencing. CON (Control group); DE (0.1% BAC treated group); DE + Ω-3 (0.1% BAC with 200mg/mL omega-3 treated mice); DE + HY7302L (0.1% BAC with 108 CFU/mL HY7302 treated mice); DE + HY7302H (0.1% BAC with 109 CFU/mL HY7302 treated mice).


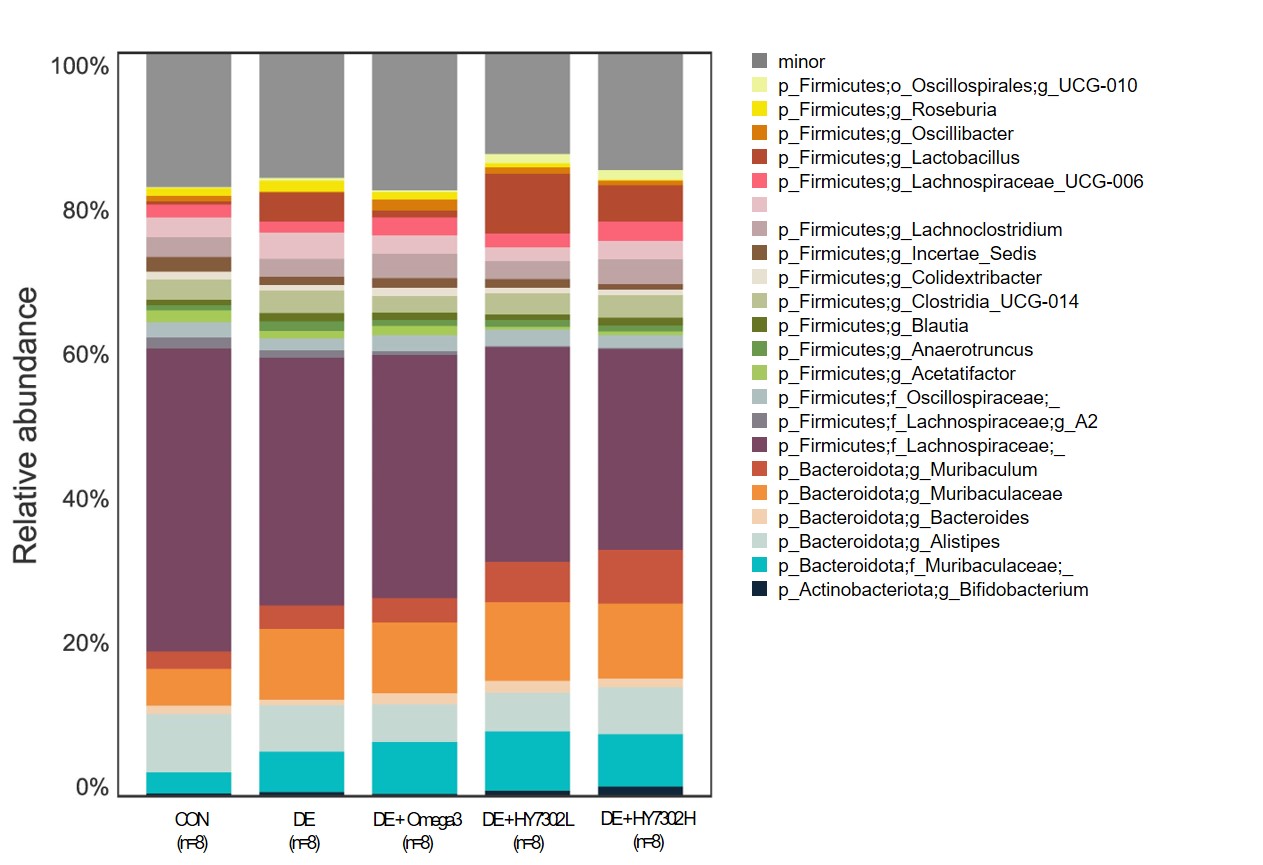


**Figure S2.** **Effect of HY7302 on microbial taxa differing in BAC-induced cornea damag.** Linear discriminant analysis effect size (LEfSe) results (A) a bar plot between DE (Dry Eye) and Control group. (B) Omega 3, (C) HY7302 L (Low concentration), and (D) HY7302 H (High concentration) compared to the DE group (LDA > 2.0)


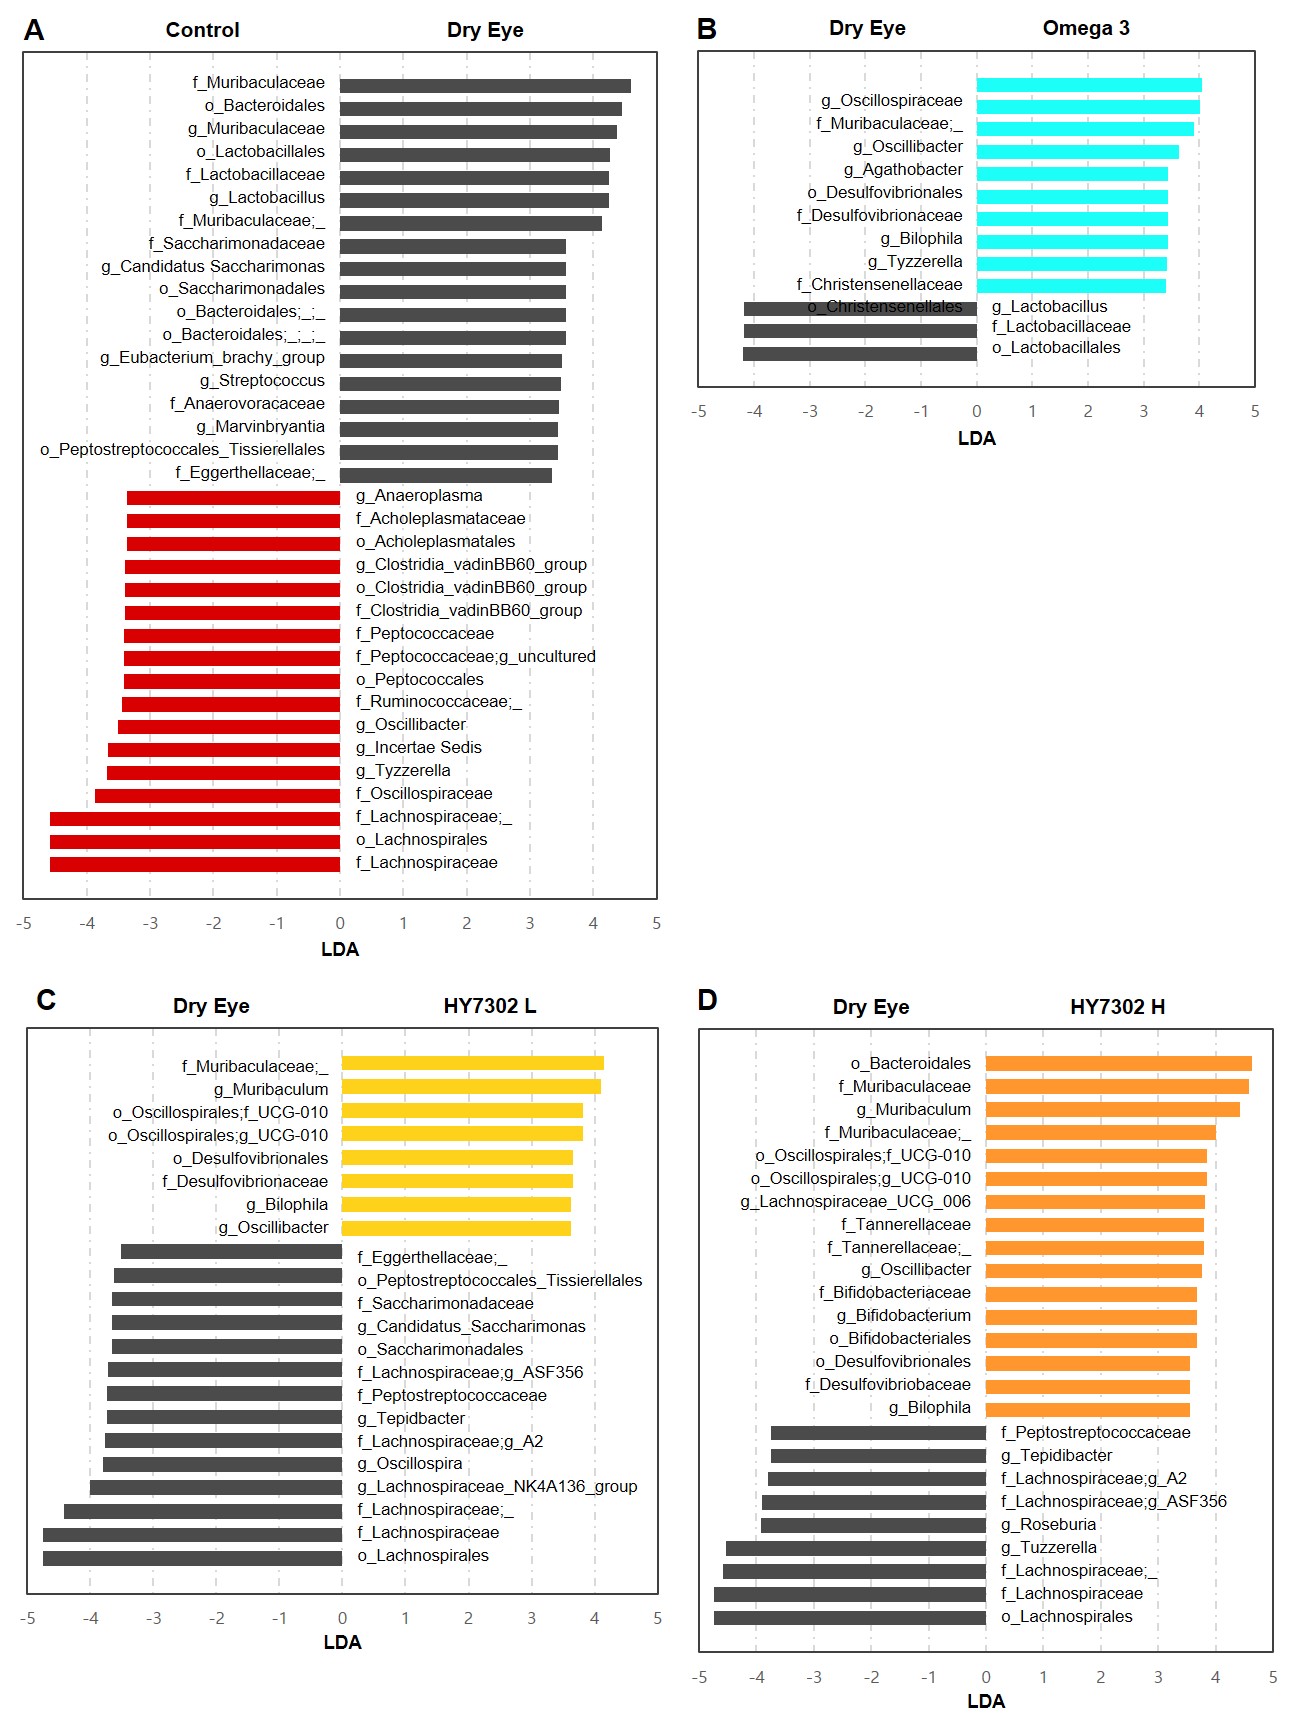


**
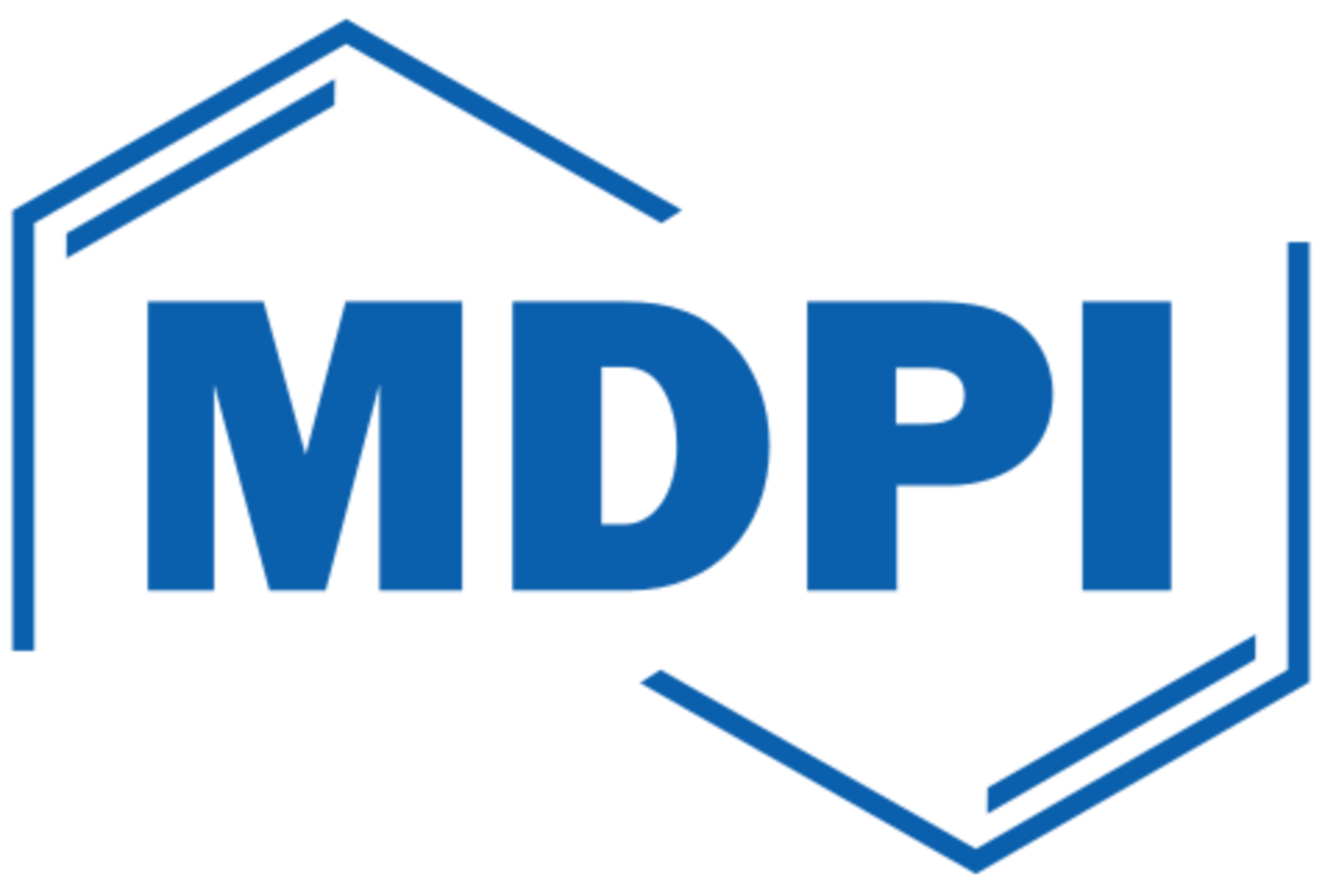
**
